# Supplementary material for: Vav1 and mutant K-Ras synergize in the early development of pancreatic ductal adenocarcinoma in mice
Source: PubMed Central journal article supplement (PMC7156281; doi:10.26508/lsa.202000661), 2020-04-10
Supplement: LSA-2020-00661_SdataF6A_2.pdf [file LSA-2020-00661_SdataF6A_2.pdf]

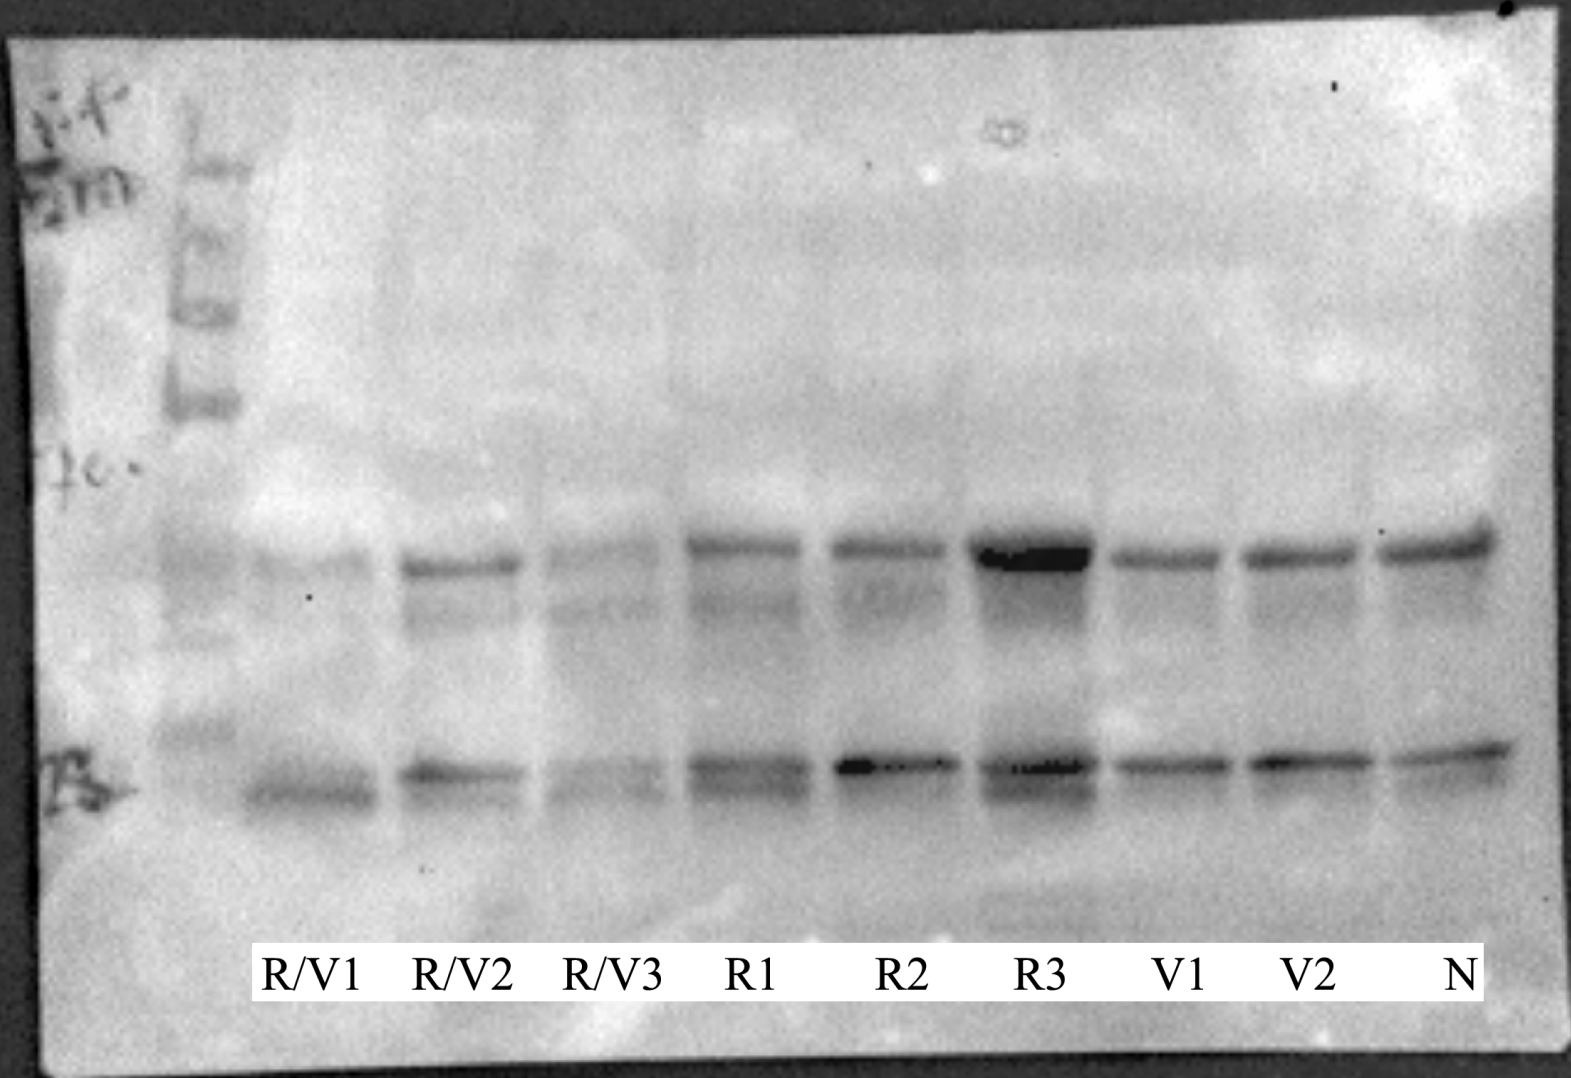

R/V1 R/V2 R/V3 R1 R2 R3 V1 V2 N
