# Supplementary material for: Vav1 and mutant K-Ras synergize in the early development of pancreatic ductal adenocarcinoma in mice
Source: PubMed Central journal article supplement (PMC7156281; doi:10.26508/lsa.202000661), 2020-04-10
Supplement: LSA-2020-00661_SdataFS2_2.pdf [file LSA-2020-00661_SdataFS2_2.pdf]

Liver spleen

N P P N N P P N

GFP ↑

+

|  
|  
|  
|  
|  
|

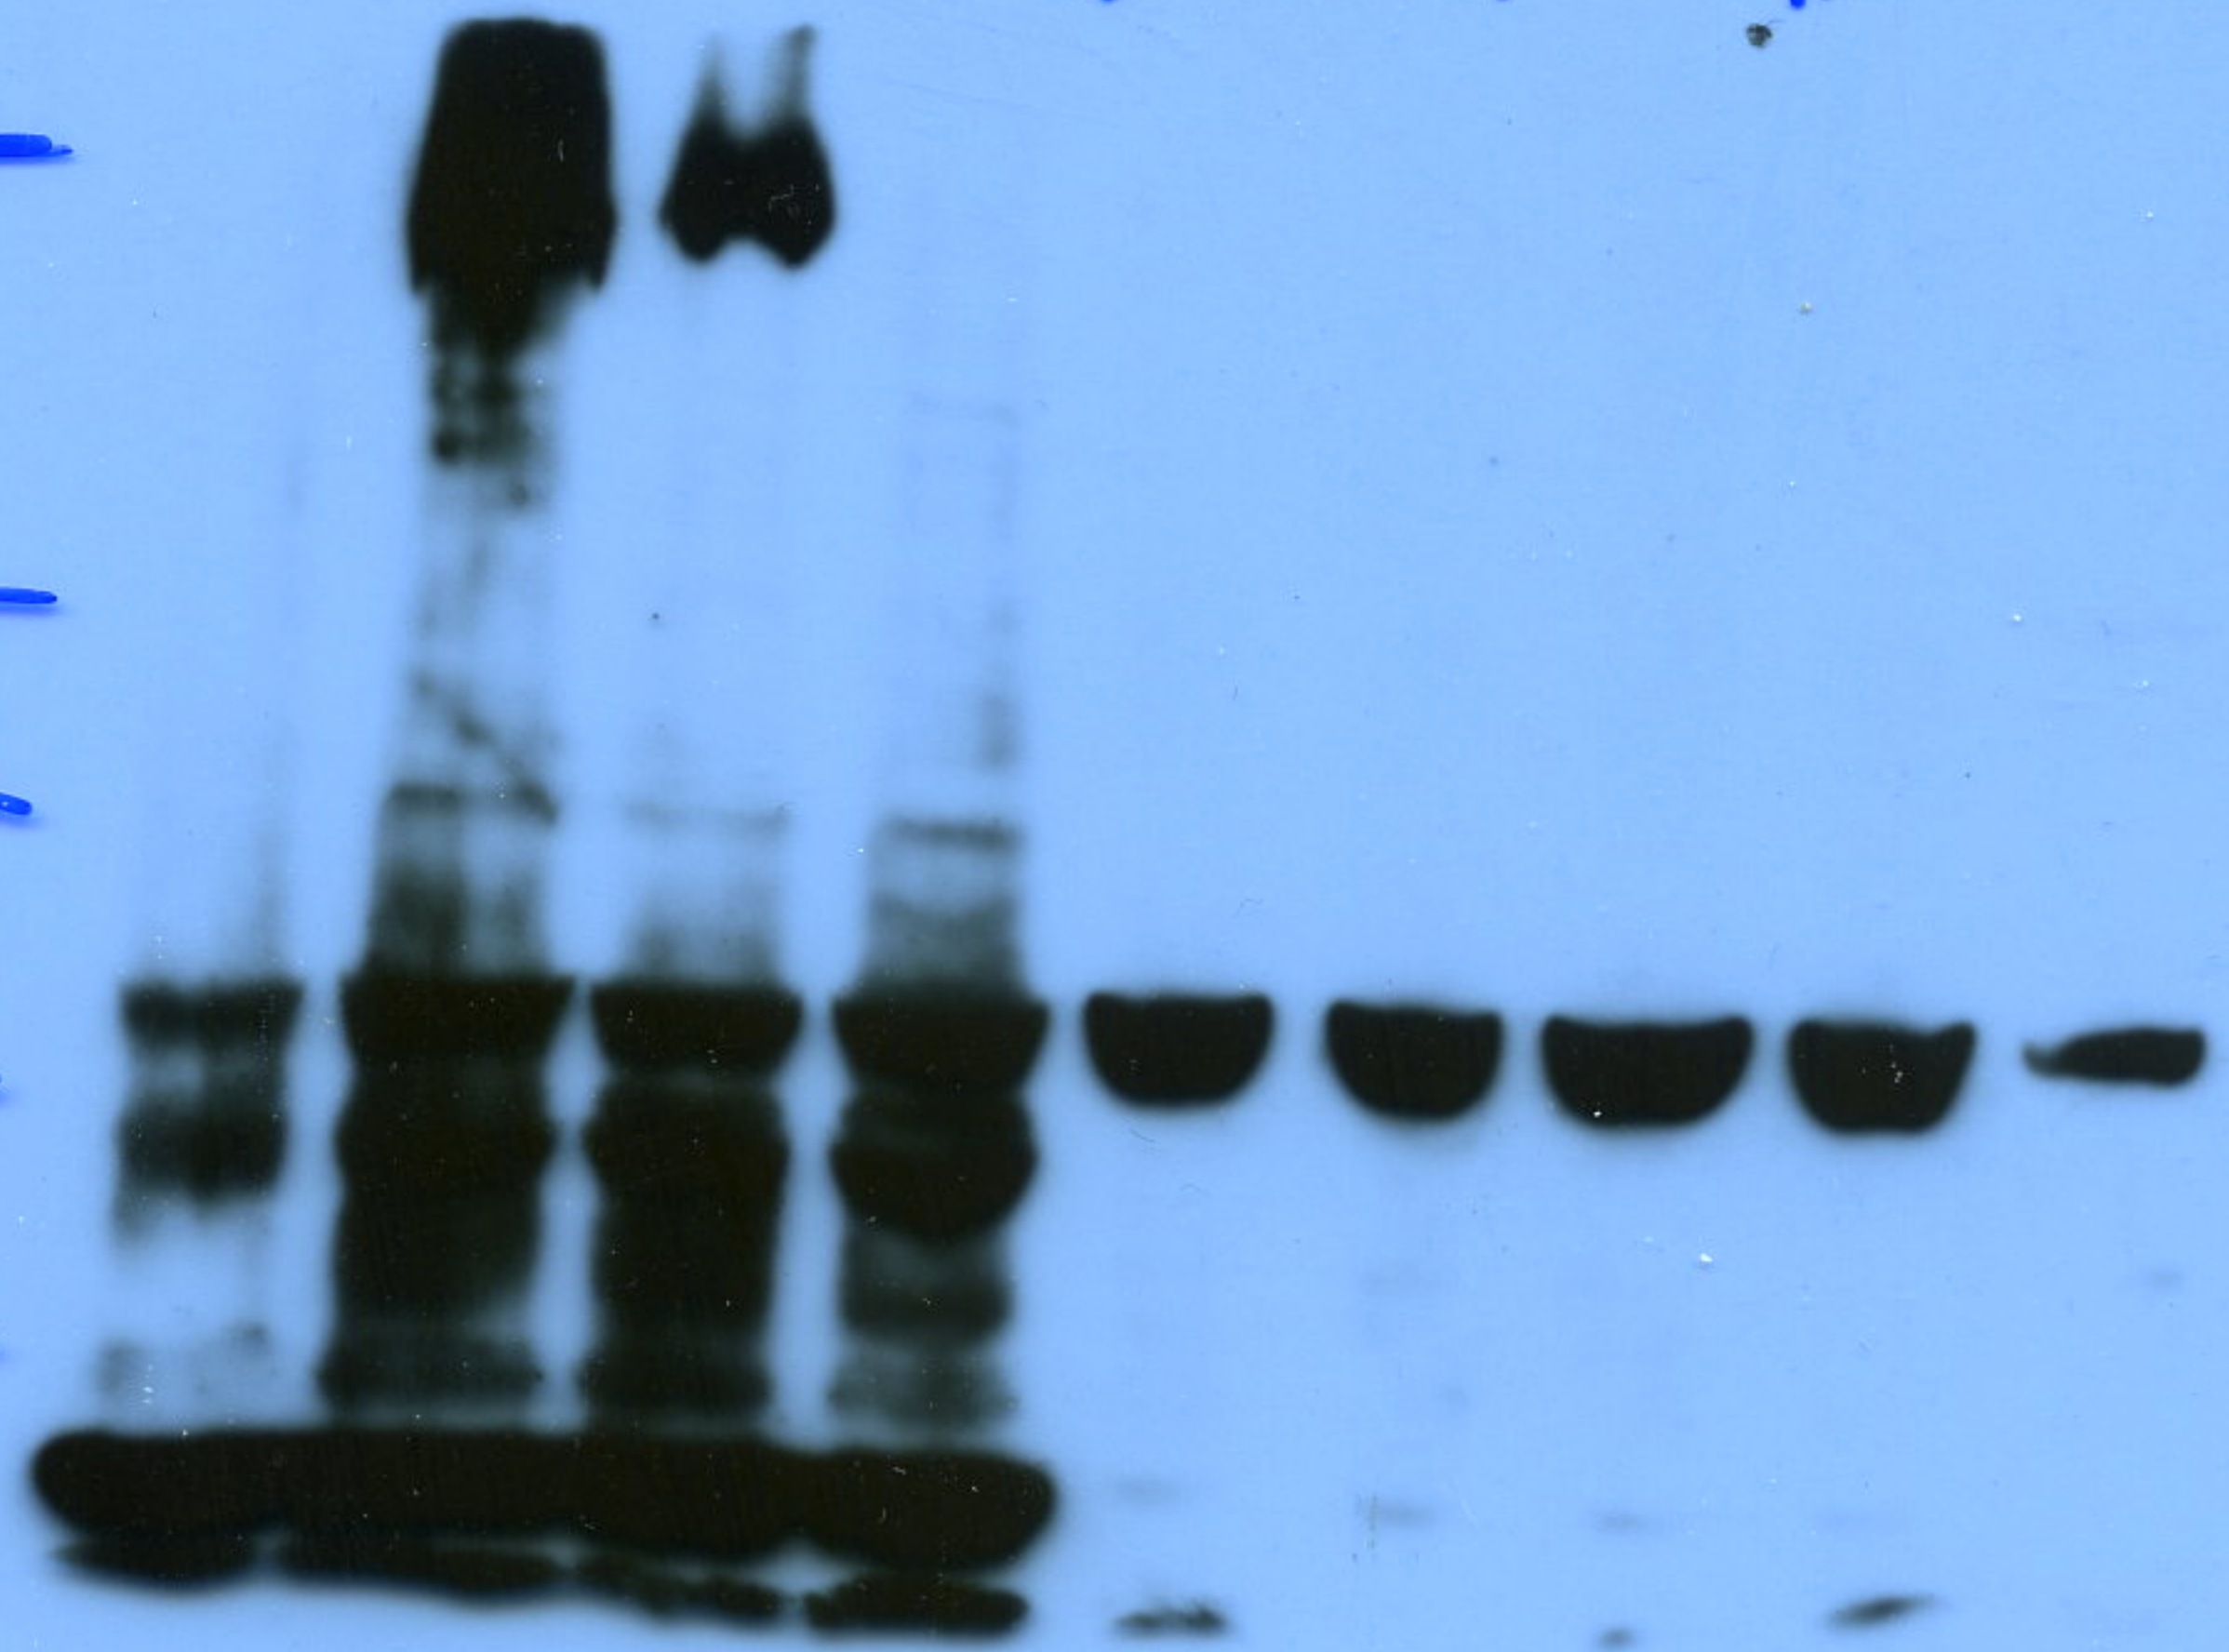

Actin  
(after GFP)
