# Supplementary material for: Vav1 and mutant K-Ras synergize in the early development of pancreatic ductal adenocarcinoma in mice
Source: PubMed Central journal article supplement (PMC7156281; doi:10.26508/lsa.202000661), 2020-04-10

liver

spleen

N P P N N P P N

120  
95  
78  
|

α Vav

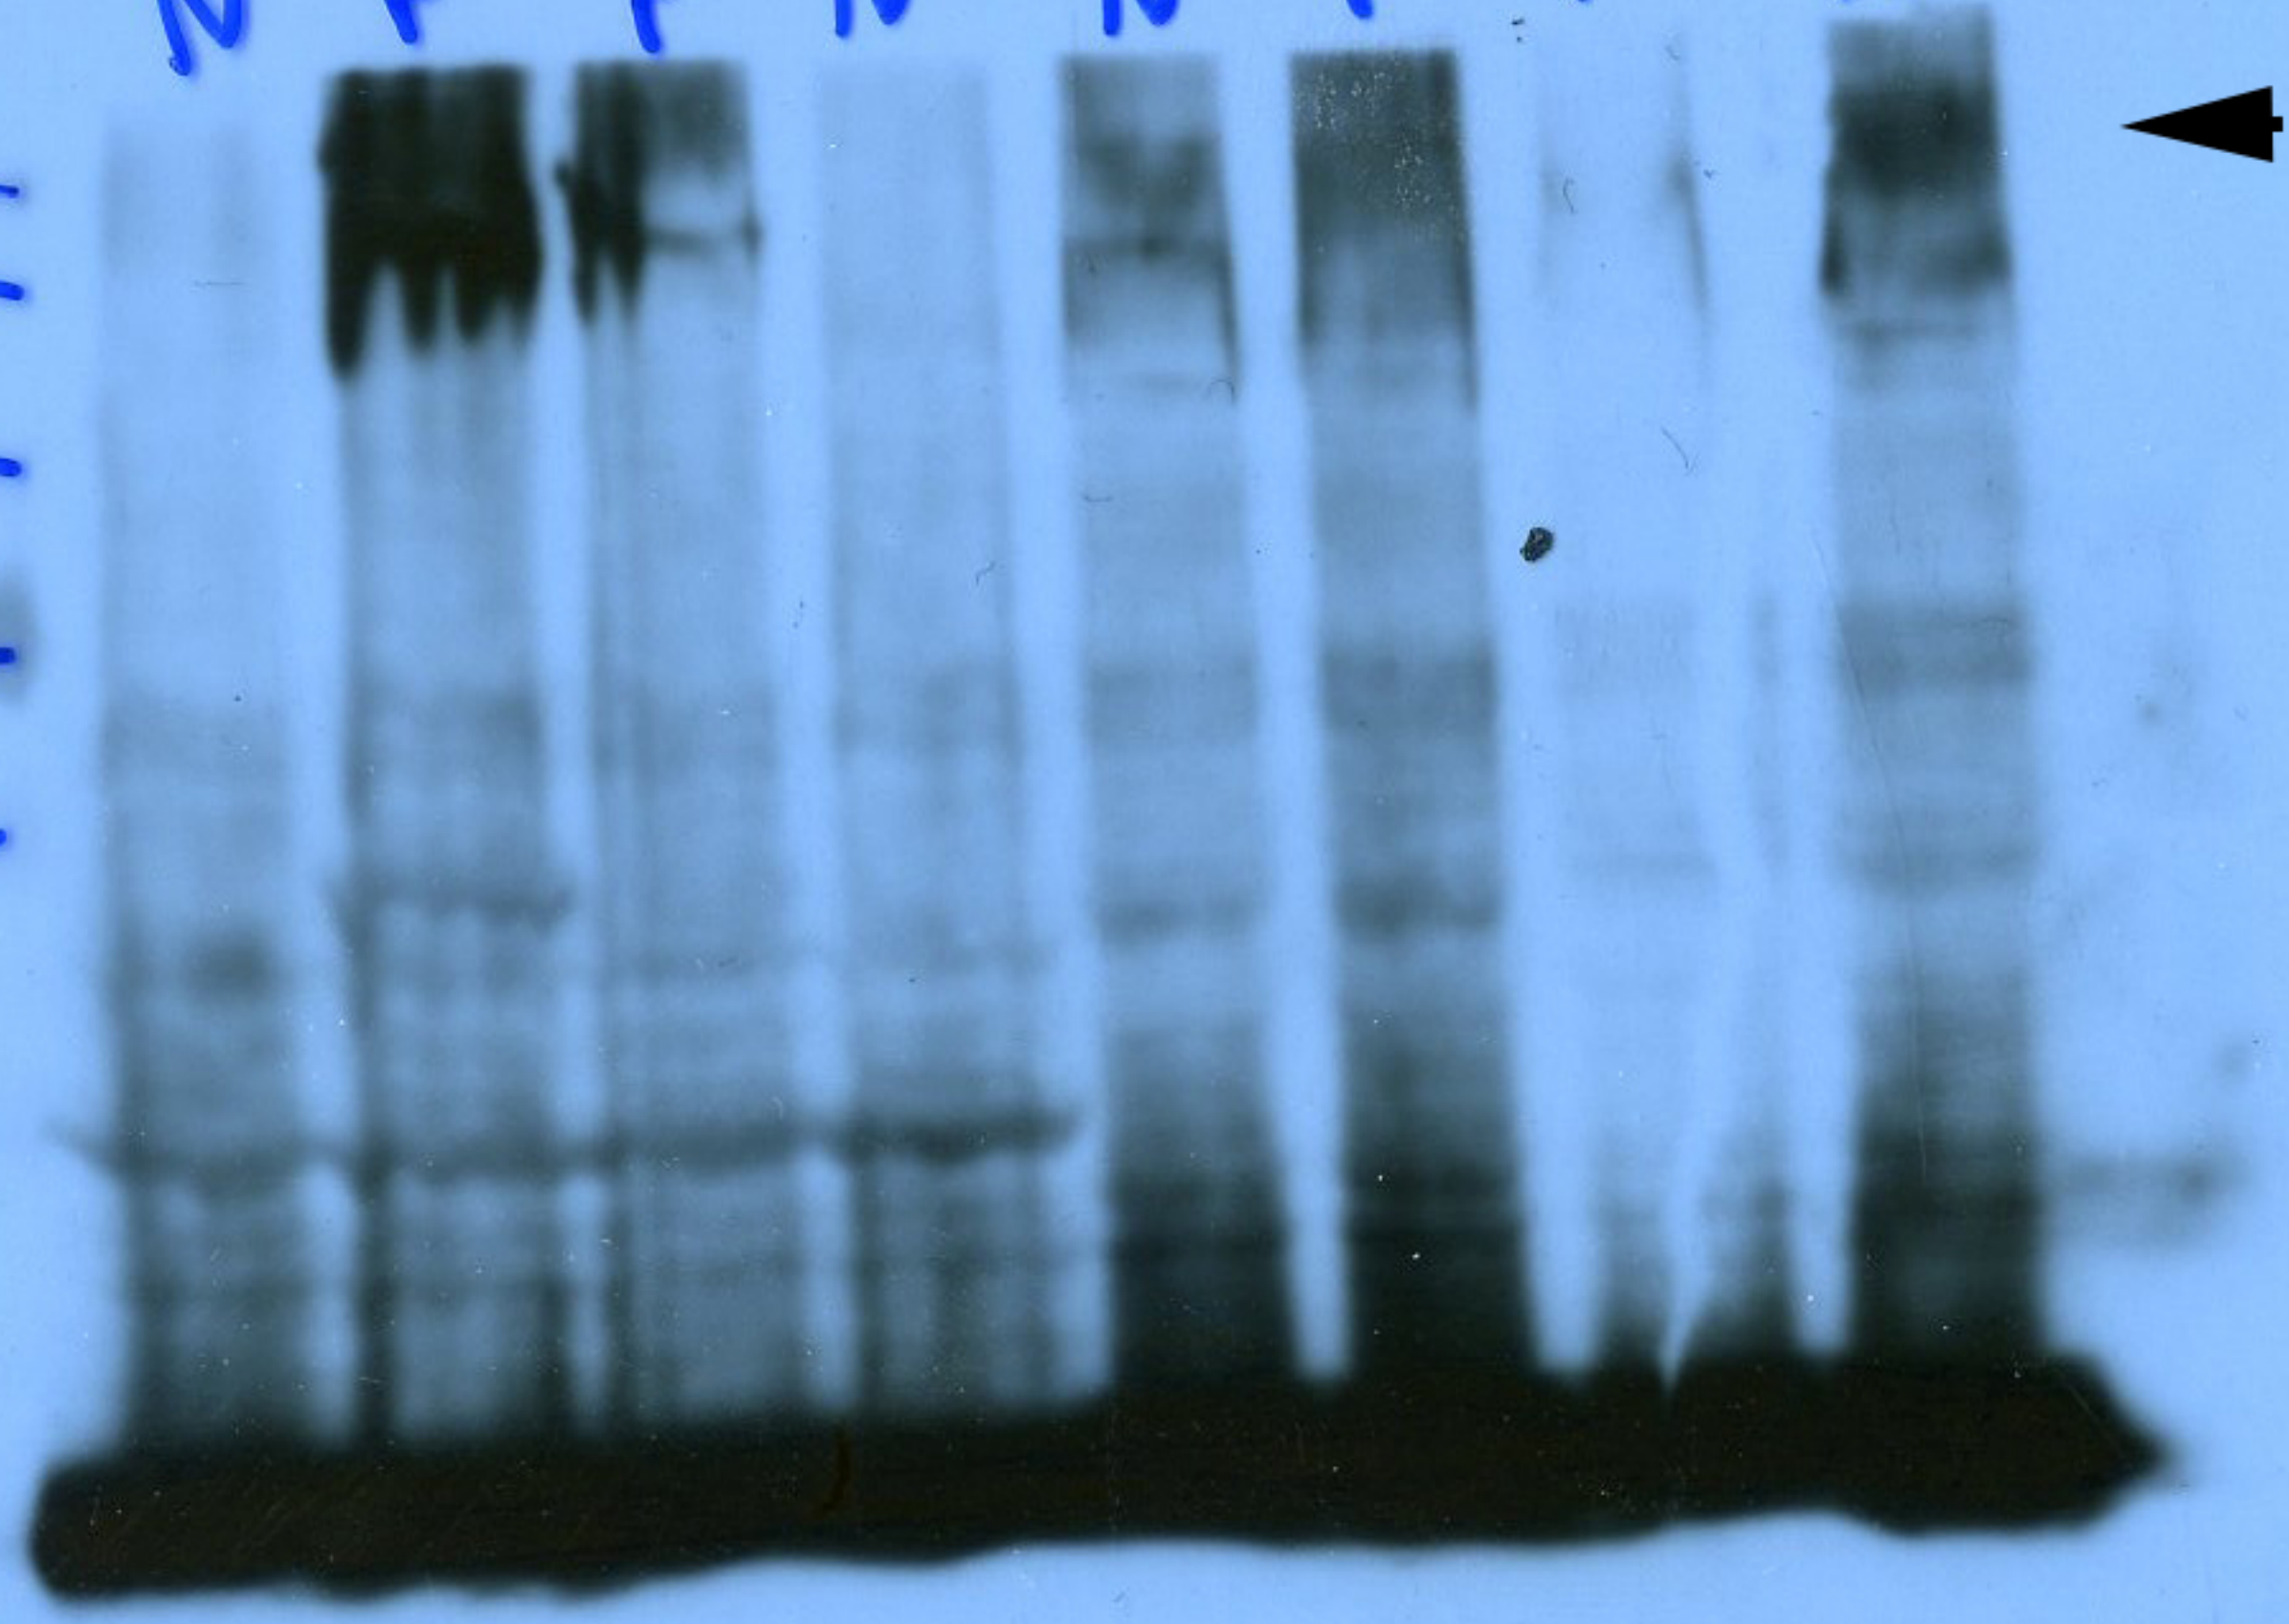

Supplement: LSA-2020-00661_SdataFS2_3.pdf [file LSA-2020-00661_SdataFS2_3.pdf]
